# Supplementary material for: Development of intestinal M cells and follicle-associated epithelium is regulated by TRAF6-mediated NF-κB signaling
Source: PubMed Central journal article supplement — J Exp Med. 2018 Feb 5;215(2):501–19. doi: 10.1084/jem.20160659 (PMC5789402; doi:10.1084/jem.20160659), 2018-02-05
Supplement: JEM_20160659_sm.pdf [file JEM_20160659_sm.pdf]

SUPPLEMENTAL MATERIAL

Kanaya et al., <https://doi.org/10.1084/jem.20160659>

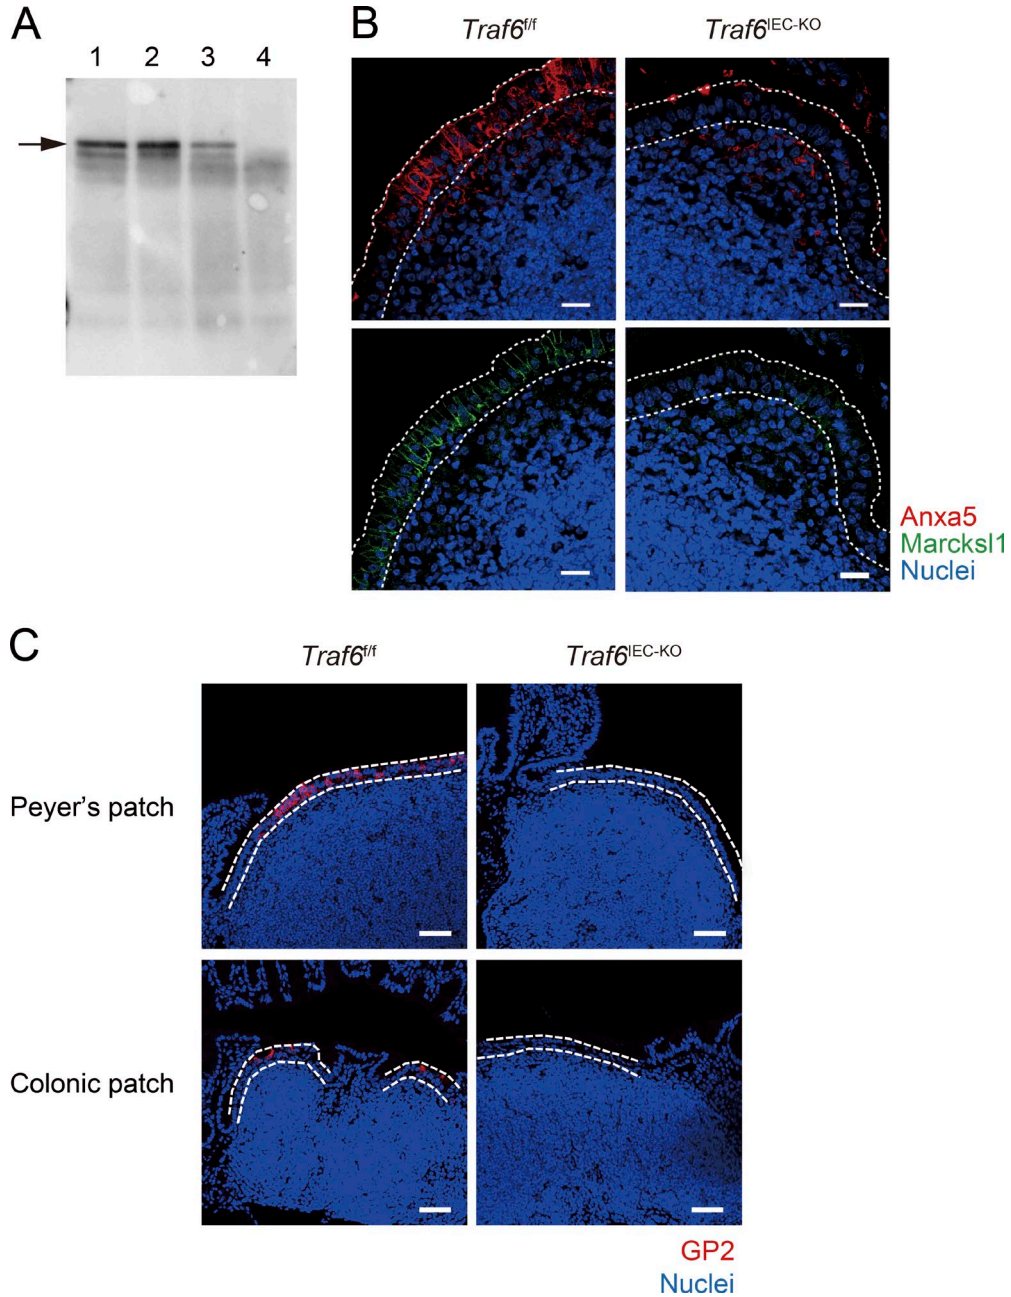

Figure S1. **M cells are absent in the GALT of *Traf6<sup>IEC-KO</sup>* mice.** (A) Western blot of TRAF6 protein. Lanes 1 and 2 are samples of splenocytes and IECs from a *Traf6<sup>fl/fl</sup>* mouse, respectively; lanes 3 and 4 are from a *Traf6<sup>IEC-KO</sup>* mouse. The arrow indicates TRAF6 protein. Data are representative of three independent experiments. (B) PPs of *Traf6<sup>fl/fl</sup>* and *Traf6<sup>IEC-KO</sup>* mice were immunostained with anti-Anxa5 and anti-Marcksl1 antibodies. Nuclei were counterstained with DAPI (blue). Dotted lines indicate FAE. Bars, 20  $\mu$ m. (C) PPs and colonic patches immunostained with anti-GP2 antibody. Nuclei were counterstained with DAPI (blue). Bars, 40  $\mu$ m. Data are representative of two independent experiments.

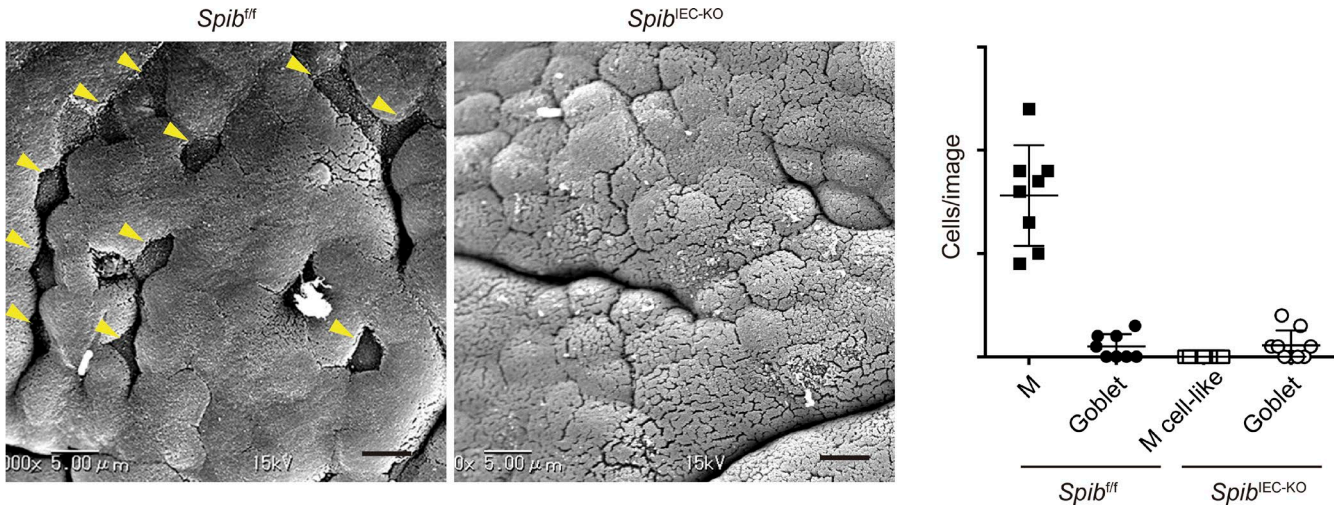

Figure S2. **Goblet cells are not increased in FAE of *Spib*<sup>IEC-KO</sup> mice.** (A) PP FAE of *Spib*<sup>IEC-KO</sup> mice was examined by scanning electron microscopy. Arrowheads indicate M cells. Bars, 5  $\mu$ m. (B) The number of M cells, M cell-like cells, and goblet cells was quantified.

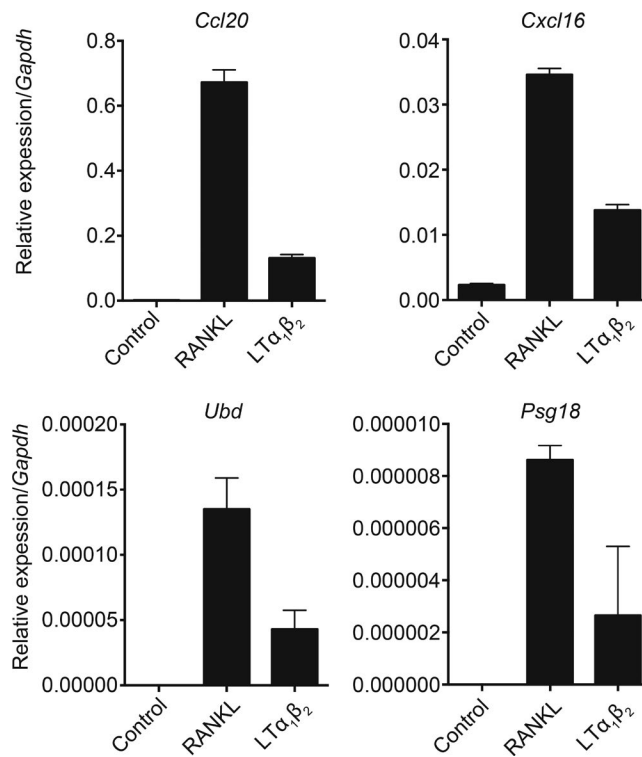

Figure S3. **RANKL prominently up-regulated the expression of FAE-associated genes in organoids.** Organoids from BALB/c mice were stimulated with RANKL or  $LT\alpha_1\beta_2$  for 3 d, and the expression of FAE-associated genes was analyzed by quantitative PCR (normalized with *Gapdh*, mean  $\pm$  SEM,  $n = 3$ ).

Table S1. **Primer sequences used for quantitative PCR analysis**

| Primer name                   | Sequence (5' to 3')     |
|-------------------------------|-------------------------|
| Mouse <i>Gapdh</i> qPCR Fw    | TGTGTCCGTCGTGGATCTGA    |
| Mouse <i>Gapdh</i> qPCR Rv    | TTGCTGTTGAAGTCGCAGGAG   |
| Mouse <i>Gp2</i> qPCR Fw      | GATACTGCACAGACCCCTCCA   |
| Mouse <i>Gp2</i> qPCR Rv      | GCAGTTCGGTCATTGAGGTA    |
| Mouse <i>Spib</i> qPCR Fw     | AGCGCATGACGTATCAGAAGC   |
| Mouse <i>Spib</i> qPCR Rv     | GGAATCTATACACGGCACAGG   |
| Mouse <i>Ccl20</i> qPCR Fw    | AAAAGGGCTGTGAACCTCCT    |
| Mouse <i>Ccl20</i> qPCR Rv    | ACCCAGCTGTGATCATTTTC    |
| Mouse <i>Cxcl16</i> qPCR Fw   | GTGGGTCGGTGAAGTAGTGG    |
| Mouse <i>Cxcl16</i> qPCR Rv   | ACTGGCTTGAGGCAAAATGTT   |
| Mouse <i>Psg18</i> qPCR Fw    | AGCAACGAAGTCCATCATCAGAG |
| Mouse <i>Psg18</i> qPCR Rv    | AAGAGCCAACGGATGGAGATC   |
| Mouse <i>Muc3</i> qPCR Fw     | TTCTATGGCCACGGTGT       |
| Mouse <i>Muc3</i> qPCR Rv     | TGTTACTGTACACTCACTTCC   |
| Mouse <i>Ccl9</i> qPCR Fw     | TACTGCCTCTCCTTC         |
| Mouse <i>Ccl9</i> qPCR Rv     | TTGAAAGCCCATGTGA        |
| Mouse <i>Tnfrsf25</i> qPCR Fw | GTGCAGAACCTCTACCCCAATG  |
| Mouse <i>Tnfrsf25</i> qPCR Rv | TGGAGAATGTCGATGGCCA     |
| Mouse <i>Marcks1</i> qPCR Fw  | GGTGATTCCTCAGCCTCCTC    |
| Mouse <i>Marcks1</i> qPCR Rv  | CTCCTCTCTGTGTCTCCTTCCTT |
| Mouse <i>Anxa5</i> qPCR Fw    | TGCGCACCTCCCTGTATTCT    |
| Mouse <i>Anxa5</i> qPCR Rv    | GCGGGACACTGCTTTCATC     |
| Mouse <i>Nfkb2</i> qPCR Fw    | ATTGTACGGCTGCGCTTCTC    |
| Mouse <i>Nfkb2</i> qPCR Rv    | ACCCGCTGTCTTGTCCATTCC   |
| Mouse <i>Relb</i> qPCR Fw     | CGAGAGCAAACGAAGGAAAA    |
| Mouse <i>Relb</i> qPCR Rv     | TGGAAGCAGGAAGAAATCA     |
| Mouse <i>Muc2</i> qPCR Fw     | CAACAAGCTTCACCACAATCTCT |
| Mouse <i>Muc2</i> qPCR Rv     | CAGACCAAAAAGCAGCAAGGT   |
| Mouse <i>Ubd</i> qPCR Fw      | AAAATCCTCAAGCCCCATCG    |
| Mouse <i>Ubd</i> qPCR Rv      | GCCATGATCTTCCATCTTCCA   |
| Mouse <i>Cxcl10</i> qPCR Fw   | AAGTGCTGCCGTCATTTTCT    |
| Mouse <i>Cxcl10</i> qPCR Rv   | CCTATGGCCCTCATTCTCAC    |
| Mouse <i>Nfkb1a</i> qPCR Fw   | ACACCCAGCATCTCCACTC     |
| Mouse <i>Nfkb1a</i> qPCR Rv   | ATCAGACCCAAAGTCACCA     |
| Human <i>GP2</i> qPCR Fw      | GAGAGAAATCAAACCCATGCCA  |
| Human <i>GP2</i> qPCR Rv      | ACTGCATCCCCTTCGTAAGGAT  |
| Human <i>SPIB</i> qPCR Fw     | GAGGAAGACTTACCGTTGGACAG |
| Human <i>SPIB</i> qPCR Rv     | TCAGTAGCCCAGCAGGAA      |

Fw, forward; qPCR, quantitative PCR; Rv, reverse.
